# Supplementary material for: Validation of the Unesp-Botucatu composite scale to assess acute postoperative abdominal pain in sheep (USAPS)
Source: PubMed Central journal article supplement (PMC7556455; doi:10.1371/journal.pone.0239622), 2020-10-14
Supplement: pone.0239622.s001.pdf [file pone.0239622.s001.pdf]

**S1 Table. Ethogram with the description of the behaviours analyzed in 48 sheep submitted to laparoscopy [5,11,20-22,34-40].**

| <b>Behavioural category</b>                                   | <b>Description</b>                                                                                                                                                                                                            |
|---------------------------------------------------------------|-------------------------------------------------------------------------------------------------------------------------------------------------------------------------------------------------------------------------------|
| Eat                                                           | Act of eating feed                                                                                                                                                                                                            |
| Ruminate                                                      | Act of ruminating                                                                                                                                                                                                             |
| Drink                                                         | Act of drinking water                                                                                                                                                                                                         |
| Urinate                                                       | Act of urinating                                                                                                                                                                                                              |
| Defecate                                                      | Act of defecating                                                                                                                                                                                                             |
| Normal interaction                                            | Active, attentive to the environment, interacts with and/or follows other animals.                                                                                                                                            |
| Reduced interaction                                           | Apathetic: may remain close to other animals but interacts little.                                                                                                                                                            |
| Absent interaction                                            | Very apathetic: is isolated or does not follow other animals, is not interested in the environment.                                                                                                                           |
| Normal locomotion                                             | Moves about freely, without altered locomotion; when stopped, the pelvic limbs are parallel to the thoracic limbs.                                                                                                            |
| Reduced/altered locomotion                                    | Moves about with restriction and/or short steps and/or pauses and/or lameness with limb support; when stopped.                                                                                                                |
| Absent/abnormal locomotion                                    | Reluctant to get up or gets up with difficulty; does not move or demonstrates unstable or rigid walking and/or limps with little or no limb support; may walk backward or walk in a circle or lean against a surface or fall. |
| Head above the withers or eating                              | Occipital is positioned above the withers or eating                                                                                                                                                                           |
| Head at the height of the withers                             | Occipital is positioned at the same level of the withers                                                                                                                                                                      |
| Head below the withers (except when eating)                   | Occipital is positioned below the withers (except when eating)                                                                                                                                                                |
| Standing still in normal posture                              | Quadrupedal position when not moving                                                                                                                                                                                          |
| Standing in altered posture                                   | Quadrupedal position with arched back and pelvic limbs rigid and/or caudally extended (pelvic limbs may be more open and further back than normal)                                                                            |
| Kick and stamp the limbs on the ground                        | Kicks the limbs while standing                                                                                                                                                                                                |
| Lying down with extension of the head and neck and/or limb(s) | Stretches the head and neck and thoracic or pelvic limbs when in recumbence                                                                                                                                                   |
| Lying down                                                    | Lying in ventral or lateral recumbence                                                                                                                                                                                        |
| Lying down with head turned back                              | Lying down with the head turning back                                                                                                                                                                                         |
| Lying with head supported on or close to the ground           | Lying down with head close or supported on the ground                                                                                                                                                                         |
| Quick and repeated tail movements                             | Energetic tail wagging (except when breastfeeding)                                                                                                                                                                            |
| Keep the tail straight (when not urinating or defecating)     | Tail stretched (when not urinating or defecating)                                                                                                                                                                             |
| Arch the back                                                 | Back arching                                                                                                                                                                                                                  |
| Body tremors                                                  | Back and abdomen (mostly) trembling                                                                                                                                                                                           |
| Body rotation                                                 | Rotates body partially or totally, without getting up                                                                                                                                                                         |
| Attention to the affected area                                | Does not look                                                                                                                                                                                                                 |
|                                                               | Turns the head and looks                                                                                                                                                                                                      |
|                                                               | Licks or tries to lick or avoids contact of the area with surfaces or other animals                                                                                                                                           |
