# Supplementary material for: Validation of the Unesp-Botucatu composite scale to assess acute postoperative abdominal pain in sheep (USAPS)
Source: PubMed Central journal article supplement (PMC7556455; doi:10.1371/journal.pone.0239622), 2020-10-14
Supplement: pone.0239622.s002.pdf [file pone.0239622.s002.pdf]

**S2 Table. Criteria used to select the behaviours included in the pre-refinement of the USAPS used for video analysis (S3 Table), based on content validity and behaviours reported in the literature.**

| Variable                              | Criterion                                                                                                                                                                                         | Ev.1 | Ev.2 | Ev.3 | Score       | Ethogram | Literature   |
|---------------------------------------|---------------------------------------------------------------------------------------------------------------------------------------------------------------------------------------------------|------|------|------|-------------|----------|--------------|
| <b>Interaction</b>                    | <i>Active: attentive to the environment, interacts and/or follows other animals</i>                                                                                                               | 1    | 1    | 1    | <b>1</b>    | x        | [5,20,36]    |
|                                       | <i>Apathetic: may remain close to other animals, but interacts little</i>                                                                                                                         | 1    | 1    | 1    | 1           | x        | [20,36]      |
|                                       | <i>Very apathetic: isolated or does not follow other animals, not interested in the environment</i>                                                                                               | 1    | 1    | 1    | <b>1</b>    | x        | [20,36]      |
| <b>Locomotion</b>                     | <i>Moves about freely, without altered locomotion; when stopped, the pelvic limbs are parallel to the thoracic limbs</i>                                                                          | 1    | 1    | 1    | <b>1</b>    | x        | [5,20,34,36] |
|                                       | <i>Moves about with restriction and/or short steps and/or pauses and/or lameness; when stopped, the thoracic or pelvic limbs may be more open and further back than normal</i>                    | 1    | 1    | 1    | <b>1</b>    | x        | [5,20,34-36] |
|                                       | <i>Difficulty and/or reluctant to get up; not moving and/or walking abnormally and/or limping; walks backward or on knees; jumps like a rabbit, walks in a circle; may lean against a surface</i> | 1    | 0    | 1    | <b>0.66</b> | x        | [5,20,34-36] |
| <b>Head position</b>                  | <i>Head above the withers or eating</i>                                                                                                                                                           | 1    | 0    | 1    | <b>0.66</b> | x        | [20,34]      |
|                                       | <i>Head at the height of the withers</i>                                                                                                                                                          | 1    | 0    | 1    | <b>0.66</b> | x        | [20,34]      |
|                                       | <i>Head below the withers (except when eating)</i>                                                                                                                                                | 1    | 0    | 1    | <b>0.66</b> | x        | [20,34]      |
| <b>Posture</b>                        | Kicks and stamps the limbs on the ground                                                                                                                                                          | 1    | 1    | 1    | <b>1</b>    | x        | [20,34-36]   |
|                                       | <i>Extends the head and neck and/or one or more limbs</i>                                                                                                                                         | 1    | 0    | 1    | <b>0.66</b> | x        | [20,34]      |
|                                       | Body tremors (without considering the ears)                                                                                                                                                       | 1    | 1    | 0    | 0           | x        | [20,36]      |
|                                       | The pelvic limbs may be more open and further back than normal                                                                                                                                    | 1    | 1    | 1    | 1           | x        | [5,20,36]    |
| <b>Posture in recumbence</b>          | Lying down, relaxed                                                                                                                                                                               | 1    | 1    | 1    | <b>1</b>    | x        | [20,36]      |
|                                       | <i>Extends neck and body forward</i>                                                                                                                                                              | 1    | 1    | 0    | <b>0.66</b> | x        | [5,20,36]    |
|                                       | <i>Lying down with the head resting on the ground or close to the ground.</i>                                                                                                                     | 1    | 1    | 1    | <b>1</b>    |          | [5,20,34,36] |
| <b>Miscellaneous behaviours</b>       | <i>Moves the tail quickly and repeatedly (except when breastfeeding) or keeps the tail straight (except when defecating or urinating)</i>                                                         | 1    | 0    | 1    | <b>0.66</b> | x        | [5,20,36]    |
|                                       | <i>Arched back</i>                                                                                                                                                                                | 1    | 1    | 1    | <b>1</b>    | x        | [5,20,34,36] |
|                                       | Rotates body partially or totally, without getting up                                                                                                                                             | 1    | 0    | 0    | 0           | x        | [20,36]      |
| <b>Activity</b>                       | <i>Moves normally</i>                                                                                                                                                                             | 1    | 1    | 1    | <b>1</b>    |          | [5,20,34,35] |
|                                       | <i>Restless, moves more than normal or lies down and gets up frequently</i>                                                                                                                       | 1    | 1    | 1    | <b>1</b>    |          | [5,20,34,36] |
|                                       | <i>Moves less frequently or only when stimulated using a stick or does not move</i>                                                                                                               | 1    | 1    | 1    | <b>1</b>    |          | [20,36]      |
| <b>Appetite</b>                       | <i>Normorexia and/or rumination present</i>                                                                                                                                                       | 1    | 1    | 1    | <b>1</b>    | x        | [5,20,36]    |
|                                       | <i>Hyporexia</i>                                                                                                                                                                                  | 1    | 0    | 1    | <b>0.66</b> |          | [5,20,36]    |
|                                       | <i>Anorexia</i>                                                                                                                                                                                   | 1    | 1    | 1    | <b>1</b>    |          | [5,20,36]    |
| <b>Attention to the affected area</b> | Does not look                                                                                                                                                                                     | 1    | 1    | 1    | <b>1</b>    | x        | [20,36]      |
|                                       | Turns the head and looks                                                                                                                                                                          | 1    | 1    | 1    | <b>1</b>    | x        | [5,20,36]    |
|                                       | Licks or tries to lick or avoids contact of the area with surfaces or other animals                                                                                                               | 1    | 1    | 1    | <b>1</b>    | x        | [5,20,36]    |

USAPS: Unesp-Botucatu sheep acute composite pain scale; Ev. = Evaluator; each item was classified as relevant (+1), not known (0), or irrelevant (-1), the values were added and divided by the number of experts. Score: final score of content validation. In bold are the items approved in content validation, because the mean score was  $\geq 0.5$  and because the specific pain-related behavior had been reported in the ethogram (marked with "x") and literature [number of the references in the list of references]; in italics are the behaviors that remained on the scale after refinement.
