# Supplementary material for: Validation of the Unesp-Botucatu composite scale to assess acute postoperative abdominal pain in sheep (USAPS)
Source: PubMed Central journal article supplement (PMC7556455; doi:10.1371/journal.pone.0239622), 2020-10-14
Supplement: pone.0239622.s003.pdf [file pone.0239622.s003.pdf]

**S3 Table. Pre-refinement of the USAPS to assess postoperative pain in sheep submitted to video analysis after content validation.**

| Principal item                  | Subitems (with sub-divisions in some subitems)                                                                                                           | video 1 | video 2 | video 3 | video 4 |
|---------------------------------|----------------------------------------------------------------------------------------------------------------------------------------------------------|---------|---------|---------|---------|
| <b>Interaction</b>              | A. Active: attentive to the environment, interacts and/or follows other animals                                                                          |         |         |         |         |
|                                 | B. Apathetic: may remain close to other animals but interacts little                                                                                     |         |         |         |         |
|                                 | C. Very apathetic: isolated or does not follow other animals, not interested in the environment                                                          |         |         |         |         |
| <b>Locomotion</b>               | A. Moves about freely, without altered locomotion; when stopped, the pelvic limbs are parallel to the thoracic limbs                                     |         |         |         |         |
|                                 | B. Moves with restriction and/or short steps and/or pauses and/or lameness; when stopped, the pelvic limbs may be more open and further back than normal |         |         |         |         |
|                                 | C. 1.1 Reluctant to get up and/or                                                                                                                        |         |         |         |         |
|                                 | 1.2 Gets up with difficulty                                                                                                                              |         |         |         |         |
|                                 | 2.1 Does not move and/or                                                                                                                                 |         |         |         |         |
|                                 | 2.2 Walks abnormally and/or                                                                                                                              |         |         |         |         |
|                                 | 2.3 Lameness                                                                                                                                             |         |         |         |         |
|                                 | 3.1 Walks backward and/or                                                                                                                                |         |         |         |         |
|                                 | 3.2 Walks in circles and/or                                                                                                                              |         |         |         |         |
| 3.3 Leans against a surface     |                                                                                                                                                          |         |         |         |         |
| <b>Head position</b>            | A. Head above the withers or eating                                                                                                                      |         |         |         |         |
|                                 | B. Head at the level of the withers                                                                                                                      |         |         |         |         |
|                                 | C. Head below the withers (except when eating)                                                                                                           |         |         |         |         |
| <b>Posture</b>                  | 1. Kicks or stamps one or more limbs on the ground                                                                                                       |         |         |         |         |
|                                 | 2.1. Extends the head and neck and/or                                                                                                                    |         |         |         |         |
|                                 | 2.2. Extends one or more limbs                                                                                                                           |         |         |         |         |
|                                 | 3. Lying down with the head resting on the ground or close to the ground                                                                                 |         |         |         |         |
| <b>Miscellaneous behaviours</b> | 1.1. Moves the tail quickly and repeatedly (except when breastfeeding) and/or                                                                            |         |         |         |         |
|                                 | 1.2. Keeps the tail straight, except when defecating or urinating                                                                                        |         |         |         |         |
|                                 | 2. Arched back                                                                                                                                           |         |         |         |         |
|                                 | 3. Body tremors (without considering the ears)                                                                                                           |         |         |         |         |
|                                 | 4. Crawls in ventral recumbence, without getting up                                                                                                      |         |         |         |         |
| <b>Activity</b>                 | A. Moves normally                                                                                                                                        |         |         |         |         |
|                                 | B. Restless, moves more than normal or lies down and gets up often                                                                                       |         |         |         |         |
|                                 | C. Moves less frequently or only when stimulated using a stick or does not move                                                                          |         |         |         |         |
| <b>Appetite</b>                 | A1. Normorexia and/or                                                                                                                                    |         |         |         |         |
|                                 | A2. Rumination present                                                                                                                                   |         |         |         |         |
|                                 | B. Hyporexia.                                                                                                                                            |         |         |         |         |
|                                 | C. Anorexia                                                                                                                                              |         |         |         |         |

USAPS: Unesp-Botucatu sheep acute composite pain scale.
