# Supplementary material for: Validation of the Unesp-Botucatu composite scale to assess acute postoperative abdominal pain in sheep (USAPS)
Source: PubMed Central journal article supplement (PMC7556455; doi:10.1371/journal.pone.0239622), 2020-10-14
Supplement: pone.0239622.s005.pdf [file pone.0239622.s005.pdf]

**S5 Table. Inter-observer matrix agreement of items of the USAPS, unidimensional scales and rescue analgesia indication.**

| Evaluator | 1                    |      |      | 2                    |      |      | 3                    |      |      | 1                    |      |      | 2                    |      |      | 3                    |      |      |
|-----------|----------------------|------|------|----------------------|------|------|----------------------|------|------|----------------------|------|------|----------------------|------|------|----------------------|------|------|
|           | <i>k<sub>w</sub></i> | Min  | Max  | <i>k<sub>w</sub></i> | Min  | Max  | <i>k<sub>w</sub></i> | Min  | Max  | <i>k<sub>w</sub></i> | Min  | Max  | <i>k<sub>w</sub></i> | Min  | Max  | <i>k<sub>w</sub></i> | Min  | Max  |
|           | <b>Interaction</b>   |      |      |                      |      |      |                      |      |      | <b>Locomotion</b>    |      |      |                      |      |      |                      |      |      |
| <b>2</b>  | <b>0.54</b>          | 0.47 | 0.61 |                      |      |      |                      |      |      | <b>0.52</b>          | 0.46 | 0.59 |                      |      |      |                      |      |      |
| <b>3</b>  | <b>0.53</b>          | 0.46 | 0.61 | <b>0.62</b>          | 0.58 | 0.66 |                      |      |      | <b>0.46</b>          | 0.38 | 0.54 | <b>0.55</b>          | 0.48 | 0.63 |                      |      |      |
| <b>4</b>  | <b>0.59</b>          | 0.52 | 0.66 | <b>0.51</b>          | 0.44 | 0.58 | <b>0.52</b>          | 0.45 | 0.58 | <b>0.61</b>          | 0.55 | 0.68 | <b>0.50</b>          | 0.42 | 0.58 | <b>0.49</b>          | 0.41 | 0.58 |
|           | <b>Head position</b> |      |      |                      |      |      |                      |      |      | <b>Posture</b>       |      |      |                      |      |      |                      |      |      |
| <b>2</b>  | <b>0.58</b>          | 0.51 | 0.65 |                      |      |      |                      |      |      | 0.41                 | 0.26 | 0.55 |                      |      |      |                      |      |      |
| <b>3</b>  | 0.46                 | 0.37 | 0.56 | <b>0.53</b>          | 0.45 | 0.61 |                      |      |      | 0.34                 | 0.14 | 0.53 | 0.37                 | 0.17 | 0.58 |                      |      |      |
| <b>4</b>  | <b>0.50</b>          | 0.42 | 0.58 | 0.48                 | 0.4  | 0.56 | 0.43                 | 0.35 | 0.52 | 0.33                 | 0.17 | 0.5  | 0.49                 | 0.39 | 0.59 | 0.32                 | 0.07 | 0.57 |
|           | <b>Activity</b>      |      |      |                      |      |      |                      |      |      | <b>Appetite</b>      |      |      |                      |      |      |                      |      |      |
| <b>2</b>  | <b>0.54</b>          | 0.48 | 0.6  |                      |      |      |                      |      |      | <b>0.53</b>          | 0.44 | 0.61 |                      |      |      |                      |      |      |
| <b>3</b>  | 0.41                 | 0.33 | 0.5  | <b>0.57</b>          | 0.51 | 0.63 |                      |      |      | <b>0.53</b>          | 0.44 | 0.62 | <b>0.54</b>          | 0.46 | 0.62 |                      |      |      |
| <b>4</b>  | <b>0.59</b>          | 0.53 | 0.65 | 0.49                 | 0.42 | 0.57 | 0.45                 | 0.37 | 0.53 | 0.25                 | 0.09 | 0.41 | 0.33                 | 0.19 | 0.46 | 0.24                 | 0.07 | 0.4  |
|           | <b>NS</b>            |      |      |                      |      |      |                      |      |      | <b>SDS</b>           |      |      |                      |      |      |                      |      |      |
| <b>2</b>  | 0.40                 | 0.13 | 0.68 |                      |      |      |                      |      |      | <b>0.68</b>          | 0.68 | 0.68 |                      |      |      |                      |      |      |
| <b>3</b>  | 0.44                 | 0.32 | 0.55 | <b>0.69</b>          | 0.69 | 0.69 |                      |      |      | <b>0.52</b>          | 0.44 | 0.59 | <b>0.59</b>          | 0.59 | 0.59 |                      |      |      |
| <b>4</b>  | <b>0.72</b>          | 0.72 | 0.72 | 0.46                 | 0.18 | 0.74 | 0.49                 | 0.17 | 0.8  | <b>0.67</b>          | 0.64 | 0.7  | <b>0.65</b>          | 0.62 | 0.69 | 0.47                 | 0.37 | 0.57 |
|           | <b>RA</b>            |      |      |                      |      |      |                      |      |      |                      |      |      |                      |      |      |                      |      |      |
| <b>2</b>  | <b>0.51</b>          | 0.43 | 0.59 |                      |      |      |                      |      |      |                      |      |      |                      |      |      |                      |      |      |
| <b>3</b>  | 0.49                 | 0.4  | 0.57 | <b>0.65</b>          | 0.57 | 0.73 |                      |      |      |                      |      |      |                      |      |      |                      |      |      |
| <b>4</b>  | <b>0.55</b>          | 0.47 | 0.63 | 0.47                 | 0.39 | 0.55 | 0.43                 | 0.35 | 0.51 |                      |      |      |                      |      |      |                      |      |      |
|           | <b>ICC</b>           | Min  | Max  | <b>ICC</b>           | Min  | Max  | <b>ICC</b>           | Min  | Max  | <b>ICC</b>           | Min  | Max  | <b>ICC</b>           | Min  | Max  | <b>ICC</b>           | Min  | Max  |
|           | <b>USAPS</b>         |      |      |                      |      |      |                      |      |      | <b>VAS</b>           |      |      |                      |      |      |                      |      |      |
| <b>2</b>  | <b>0.65</b>          | 0.59 | 0.71 |                      |      |      |                      |      |      | 0.24                 | 0.14 | 0.33 |                      |      |      |                      |      |      |
| <b>3</b>  | <b>0.57</b>          | 0.50 | 0.63 | <b>0.74</b>          | 0.69 | 0.78 |                      |      |      | 0.33                 | 0.24 | 0.42 | 0.64                 | 0.58 | 0.70 |                      |      |      |
| <b>4</b>  | <b>0.70</b>          | 0.64 | 0.75 | <b>0.63</b>          | 0.56 | 0.68 | <b>0.53</b>          | 0.46 | 0.60 | <b>0.70</b>          | 0.64 | 0.74 | 0.40                 | 0.32 | 0.48 | 0.46                 | 0.38 | 0.53 |

USAPS - Unesp-Botucatu sheep acute composite pain scale; RA - Rescue analgesia; NS – numerical; SDS - simple descriptive; VAS - visual analogue. *k<sub>w</sub>* – weighted kappa coefficient; ICC - intraclass correlation coefficient; CI - Confidence interval. Interpretation of reliability: very good 0.81 - 1.0; good 0.61 - 0.80; moderate 0.41 - 0.60; reasonable 0.21 - 0.4; poor < 0.2 [29,52,53]. Bold type corresponds to values > 0.50.
