# Supplementary material for: Validation of the Unesp-Botucatu composite scale to assess acute postoperative abdominal pain in sheep (USAPS)
Source: PubMed Central journal article supplement (PMC7556455; doi:10.1371/journal.pone.0239622), 2020-10-14
Supplement: pone.0239622.s006.pdf [file pone.0239622.s006.pdf]

**S6 Table. Scores, specificity, sensitivity and Youden index corresponding to rescue analgesia indication of the USAPS and unidimensional scales (A); 95% confidence intervals of 1,001 replications and of sensitivity and specificity >0.90 applied to estimate the diagnostic uncertainty zone of the cut-off point of each scale, according to the Youden index (B).**

| (A) USAPS               |             |      |      | NS                  |             |             |             | SDS                 |             |             |             | VAS                 |             |             |             |
|-------------------------|-------------|------|------|---------------------|-------------|-------------|-------------|---------------------|-------------|-------------|-------------|---------------------|-------------|-------------|-------------|
| Score                   | Sp          | S    | YI   | Score               | Sp          | S           | YI          | Score               | Sp          | S           | YI          | Score               | Sp          | S           | YI          |
| 0                       | 0           | 1    | 0    | 1                   | 0           | 1           | 0           | 1                   | 0           | 1           | 0           | 0                   | 0           | 1           | 0           |
| 1                       | 0.42        | 0.99 | 0.41 | 2                   | 0.59        | 1.00        | 0.59        | <b>2</b>            | <b>0.84</b> | <b>0.99</b> | <b>0.83</b> | 1                   | 0.28        | 1           | 0.28        |
| 2                       | 0.58        | 0.97 | 0.55 | 3                   | 0.84        | 0.99        | 0.83        | 3                   | 1           | 0.69        | 0.69        | 2                   | 0.30        | 1           | 0.30        |
| <b>3</b>                | 0.79        | 0.95 | 0.74 | <b>4</b>            | <b>0.97</b> | <b>0.93</b> | <b>0.90</b> | 4                   | 1           | 0.17        | 0.17        | (...)               | ...         | ...         | ...         |
| <b>4</b>                | 0.88        | 0.92 | 0.80 | 5                   | 1           | 0.77        | 0.77        |                     |             |             |             | 24                  | 0.91        | 0.96        | 0.87        |
| 5                       | 0.93        | 0.85 | 0.78 | 6                   | 1           | 0.58        | 0.58        |                     |             |             |             | 25                  | 0.93        | 0.95        | 0.87        |
| 6                       | 0.97        | 0.73 | 0.69 | 7                   | 1           | 0.41        | 0.41        |                     |             |             |             | <b>26</b>           | <b>0.94</b> | <b>0.94</b> | <b>0.88</b> |
| 7                       | 0.99        | 0.57 | 0.56 | 8                   | 1           | 0.26        | 0.26        |                     |             |             |             | 27                  | 0.95        | 0.93        | 0.88        |
| 8                       | 1           | 0.43 | 0.43 | 9                   | 1           | 0.10        | 0.10        |                     |             |             |             | 28                  | 0.95        | 0.92        | 0.87        |
| 9                       | 1           | 0.29 | 0.28 | 10                  | 1           | 0.04        | 0.04        |                     |             |             |             | (...)               | ...         | ...         | ...         |
| 10                      | 1           | 0.16 | 0.16 |                     |             |             |             |                     |             |             |             | 98                  | 1           | 0.03        | 0.03        |
| 11                      | 1           | 0.07 | 0.07 |                     |             |             |             |                     |             |             |             | 99                  | 1           | 0.02        | 0.02        |
| 12                      | 1           | 0.01 | 0.01 |                     |             |             |             |                     |             |             |             | 100                 | 1           | 0.01        | 0.01        |
|                         |             |      |      |                     |             |             |             |                     |             |             |             |                     |             |             |             |
| (B) Confidence interval |             |      |      | Confidence interval |             |             |             | Confidence interval |             |             |             | Confidence interval |             |             |             |
|                         | <b>Est.</b> | Min. | Max. |                     | <b>Est.</b> | Min.        | Max.        |                     | <b>Est.</b> | Min.        | Max.        |                     | <b>Est.</b> | Min.        | Max.        |
| <b>Replication CI</b>   | <b>3.5</b>  | 3.5  | 4.5  |                     | <b>3.5</b>  | 3.5         | 3.5         |                     | <b>1.5</b>  | 1.5         | 1.5         |                     | <b>25.5</b> | 20.5        | 26.5        |
| <b>CI &gt; 0.90</b>     | -           | 3.8  | 4.0  |                     | --          | 3.0         | 3.7         |                     | --          | 1.8         | 1.9         |                     | --          | 22          | 29          |
| <b>AUC</b>              | <b>0.96</b> | 0.94 | 0.96 |                     | <b>0.99</b> | 0.99        | 0.99        |                     | <b>0.97</b> | 0.97        | 0.98        |                     | <b>0.99</b> | 0.98        | 0.99        |

USAPS: Unesp-Botucatu sheep acute composite pain scale; NS – numerical; SDS - simple descriptive; VAS - visual analogue; Sp- Specificity; S - Sensitivity; YI - Youden Index; CI - confidence interval; CI > 0.90 - CI of specificity and sensitivity > 0.90. AUC - area under the curve; Est - estimated; Min - minimum; Max – maximum; Values in bold are in the same line of the cut-off point for each scale (A) and estimated values (B).
